# Supplementary material for: Yellow phosphor based on zero-dimensional antimony halide for white light-emitting diodes
Source: Royal Society of Chemistry journal article supplement (doi:10.1039/d3tc01701j), 2023-01-01
Supplement: d3tc01701j1.pdf [file d3tc01701j1.pdf]

## Supporting Information

### **Yellow Phosphor Based on Zero-dimensional Antimony Halide for White Light-emitting Diodes**

*Longyun Lv,<sup>1</sup> Hao Yang,<sup>1</sup> Xiaohua Cheng,<sup>1</sup> Yufan Lin,<sup>1</sup> Xuerui Chang,<sup>1</sup> Teng Cheng,<sup>1</sup> Yipeng Xie,<sup>1</sup>  
Ying Han,<sup>1</sup> Juan Li,<sup>1,\*</sup> Jun Yin,<sup>2,\*</sup> and Bin-Bin Cui<sup>1,\*</sup>*

<sup>1</sup>Advanced Research Institute of Multidisciplinary Science, School of Materials Science and Engineering, School of Chemistry and Chemical Engineering, Beijing Institute of Technology (BIT), Beijing 100081, P. R. China.

<sup>2</sup>Department of Applied Physics, The Hong Kong Polytechnic University, Kowloon 999077 Hong Kong, P. R. China.

#### **Corresponding Author**

cui-chem@bit.edu.cn

## 1. Experiment sections

**Materials:**  $\text{SbCl}_3$  (99.9%), 2,4,6-trimethylbenzenamine ( $\text{C}_9\text{H}_{13}\text{N}$ , 98%), hydrochloric acid (HCl, AR, 36-38%), N, N-dimethylformamide (DMF, AR,  $\geq 99.5\%$ ), acetone (AR, 99.5%) and ethyl ether (AR,  $\geq 99.5\%$ ) were purchased for use without further processing.

**Synthesis of 2,4,6-trimethylbenzenamine chloride:** The salt was synthesized using a rotary evaporator. We added excess hydrochloric acid (15 mL) to 2,4,6-trimethylbenzenamine (5 mL), then set condensate temperature to minus  $15^\circ\text{C}$ , with the water bath heating temperature to  $75^\circ\text{C}$  and the rotation speed to 60r/min. Distillation was continued under reduced pressure until the corresponding salt was obtained. Finally, the salt (2,4,6-trimethylbenzenamine chloride) was obtained after being dried for about 2 days in vacuum drying oven.

**Synthesis of  $(\text{NII})_2\text{SbCl}_5$  single crystal:** The  $(\text{NII})_2\text{SbCl}_5$  single crystal was prepared by antisolvent way. 186 mg (0.81 mmol)  $\text{SbCl}_3$  and 277 mg (1.62 mmol) 2,4,6-trimethylbenzenamine chloride were dissolved into 3 mL DMF in a 5 mL glass bottle and stirred for about 10 minutes to form the clear precursor solutions. Then, the glass bottle containing 1 mL of precursor solution was placed in a large test tube containing 3 mL acetone and sealed in the refrigerator for 3-4 days. Finally, the glass bottle was placed in a large test tube containing 3 mL anhydrous diethyl ether and sealed in the refrigerator for 2 days to obtain transparent single crystal. The in-situ synthesis reaction of Schiff's base is verified by hydrogen nuclear magnetic resonance (H-NMR) and carbon nuclear magnetic resonance (C-NMR).  $^1\text{H}$  NMR (600 MHz,  $\text{DMSO-d}_6$ )  $\delta/\text{ppm}$ : 7.08 (s, 2H), 2.80 (s, 3H), 2.29 (s, 3H), 2.20 (s, 3H), 2.13 (s, 6H).  $^{13}\text{C}$  NMR (151 MHz,  $\text{DMSO-d}_6$ )  $\delta/\text{ppm}$ : 194.12, 138.97, 132.24, 131.42, 129.30, 24.91, 22.03, 20.50, 17.23.

**Measurements and Instruments:** The structure data of single crystal was collected by the direct method using SHELXS-97 and refined using software of VESTA. PXRD data were recorded using a Bruker D8 Advance XRD using  $\text{Cu K}\alpha$  radiation ( $1.54 \text{ \AA}$ ). A UV-vis spectrophotometer (LAMBDA 950, PerkinElmer) was used to collect the absorption spectra. The PL spectra, the temperature-dependent PL spectra, the time-resolved photoluminescence (TRPL) spectra and PLQY were measured for the powder sample using FLS980, Edinburgh Instruments. The thermogravimetric analysis (TGA) was recorded from R.T. to  $800^\circ\text{C}$  using a TA Instruments TGAQ500 with nitrogen atmosphere.  $^1\text{H}$

NMR spectra and  $^{13}\text{C}$  NMR were recorded at 298 K on a Bruker AVANCE III 600MHz NMR Spectrometer in designated deuterated solvent.

**UV pumped LEDs based on  $(\text{NII})_2\text{SbCl}_5$ :** First, the  $(\text{NII})_2\text{SbCl}_5$  phosphors were obtained by grinding  $(\text{NII})_2\text{SbCl}_5$  single crystals. Then, blue phosphor ( $\text{BaMgAl}_{10}\text{O}_{17}:\text{Eu}^{2+}$ ), green phosphor ( $\text{Ba}_2\text{SiO}_4:\text{Eu}^{2+}$ ) and  $(\text{NII})_2\text{SbCl}_5$  phosphors were mixed in ratio of 6:1.3:18, and were blended with Sylgard 184 polydimethylsiloxane (PDMS) encapsulant. Finally, the phosphors doped PDMS were coated on a commercial UV-LED (365 nm) lamp and then the whole mold was heated at  $100^\circ\text{C}$  for 1 hour in an oven to cure PDMS. This is the entire process about fabrication UV pumped LEDs based on  $(\text{NII})_2\text{SbCl}_5$ .

**DFT methods:** Density functional theory (DFT) calculations were performed using the projector-augmented wave (PAW) method implemented in the VASP code.<sup>[1, 2]</sup> The generalized gradient approximation (GGA) with the Perdew-Burke-Ernzerhof (PBE) exchange-correlation functional and a uniform  $3\times 4\times 2$   $k$ -mesh grid in the Brillouin zone were employed to optimize the crystal structure of  $(\text{NII})_2\text{SbCl}_5$ . The atomic positions of  $(\text{NII})_2\text{SbCl}_5$  were fully relaxed until the forces on each atom less than  $0.01\text{ eV}/\text{\AA}$ . The Heyd-Scuseria-Ernzerhof hybrid functional (HSE06,  $\alpha = 0.2$ ) was used to calculate the electronic bands, projected density of states (PDOS), and charge densities for  $(\text{NII})_2\text{SbCl}_5$ . The plane-wave basis set cutoff of the wave functions was set at 450 eV for the structural optimization at GGA/PBE level and 350 eV for the electronic bands and PDOS calculations at HSE06 level.

## 2. Figure sections

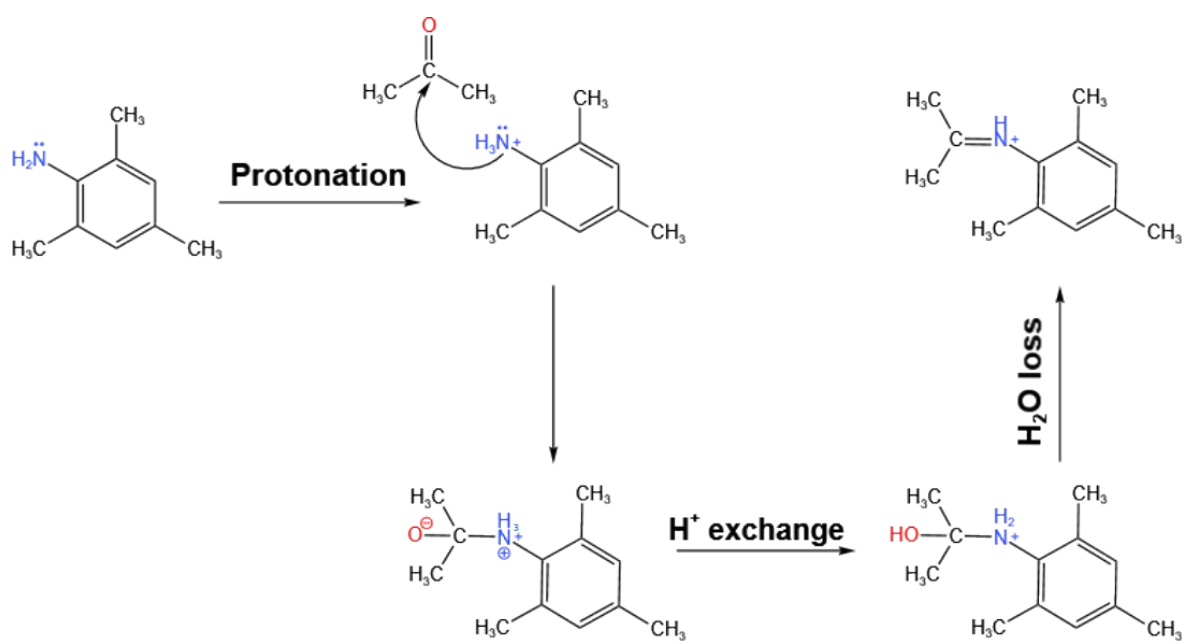

Figure S1 The synthetic route about NII<sup>+</sup> cation.

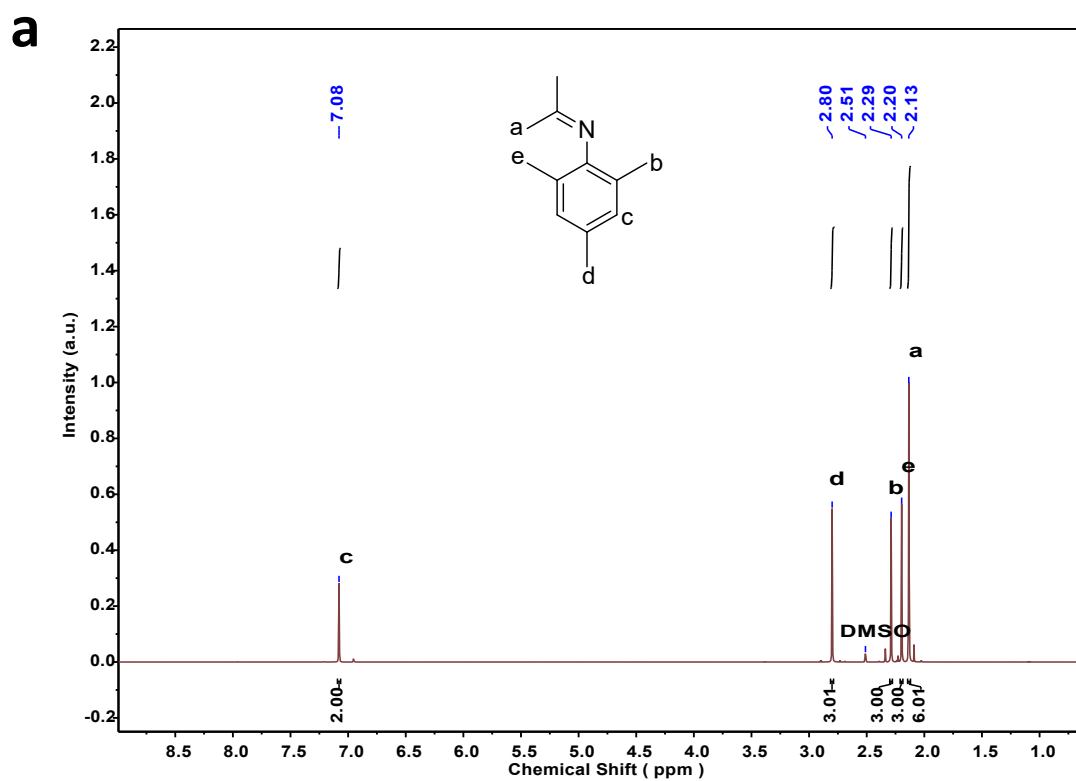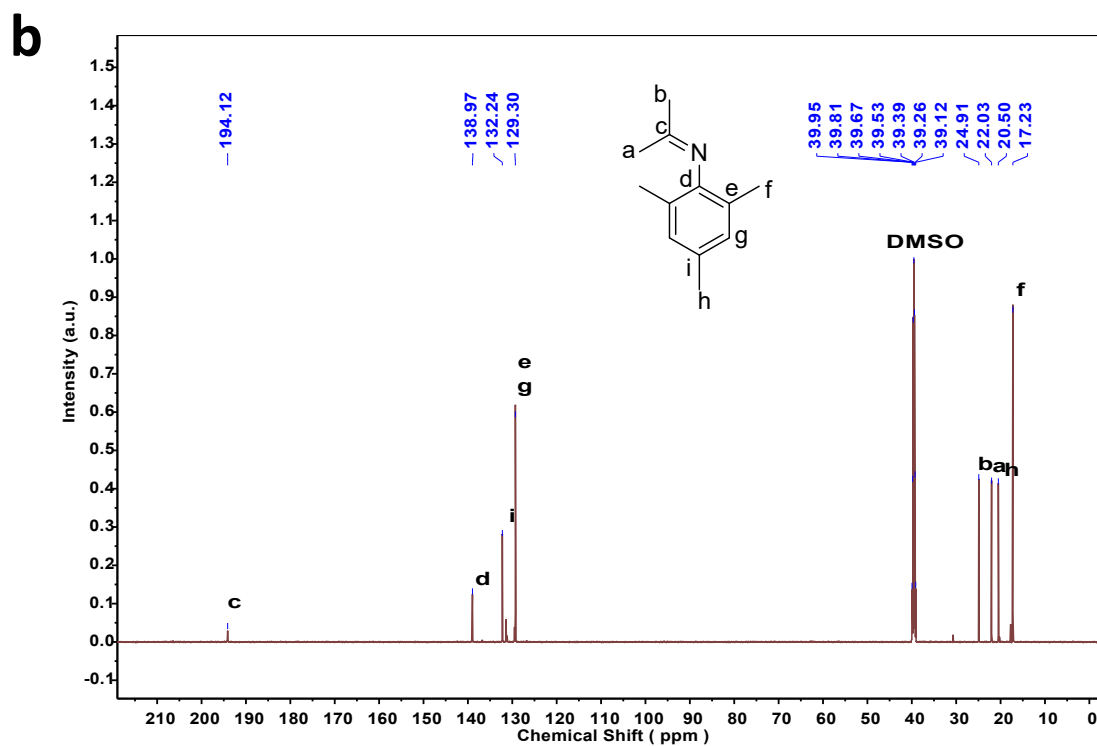

**Figure S2** The information of (a)  $^1\text{H-NMR}$  spectroscopy and (b)  $^{13}\text{C-NMR}$  spectroscopy about  $(\text{NII})_2\text{SbCl}_5$  in  $\text{DMSO-d}_6$ .

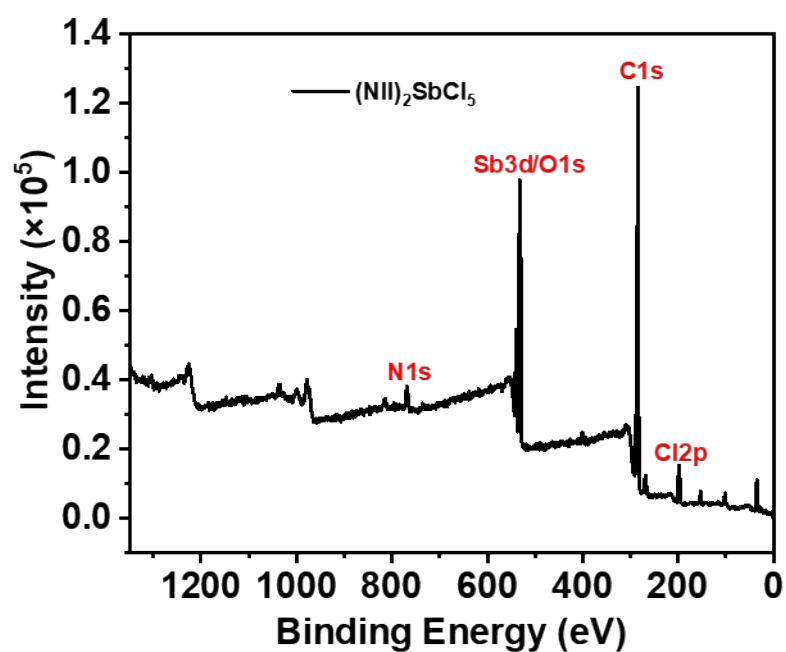

**Figure S3** X-ray photoelectron spectroscopic (XPS) analysis of  $(\text{NII})_2\text{SbCl}_5$  powders.

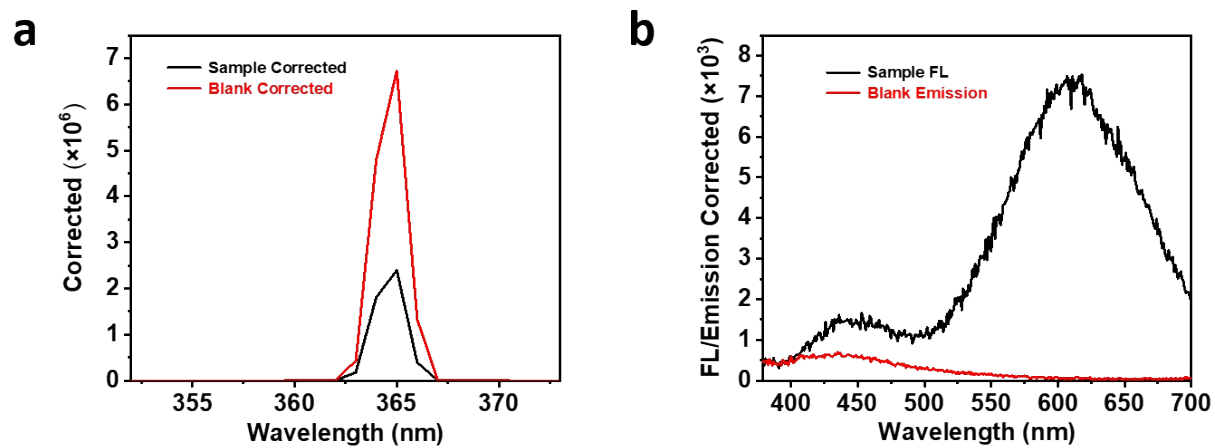

**Figure S4** PLQY spectrum of  $(\text{NII})_2\text{SbCl}_5$  crystal under excitation of 365 nm

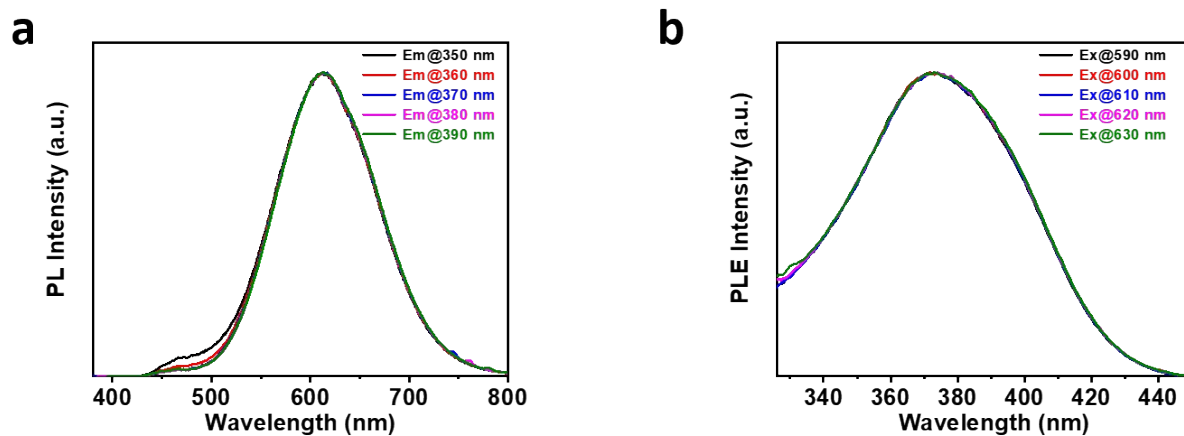

**Figure S5** (a) Excitation-wavelength-dependent photoluminescence (PL) spectra of  $(\text{NII})_2\text{SbCl}_5$ . (b) Emission-wavelength-dependent photoluminescence excitation (PLE) spectra of  $(\text{NII})_2\text{SbCl}_5$ .

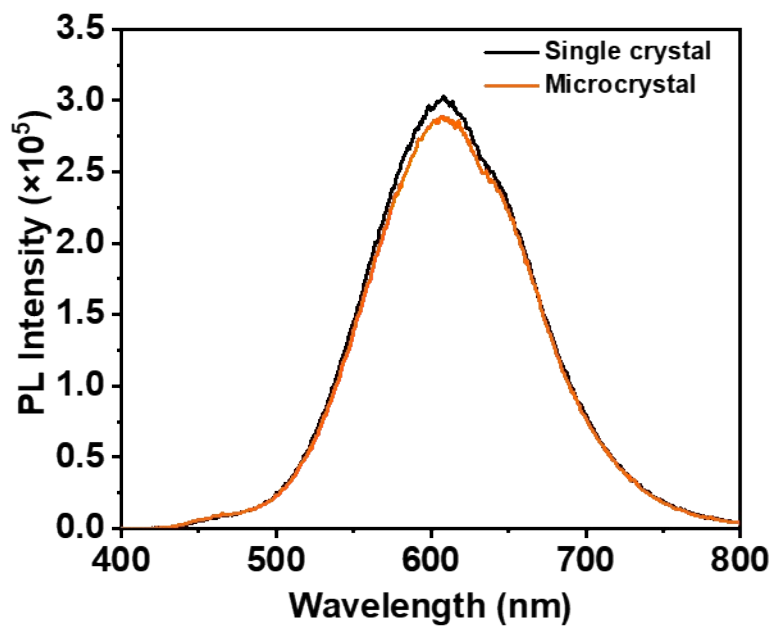

**Figure S6** PL spectrum of bulk and powder crystals.

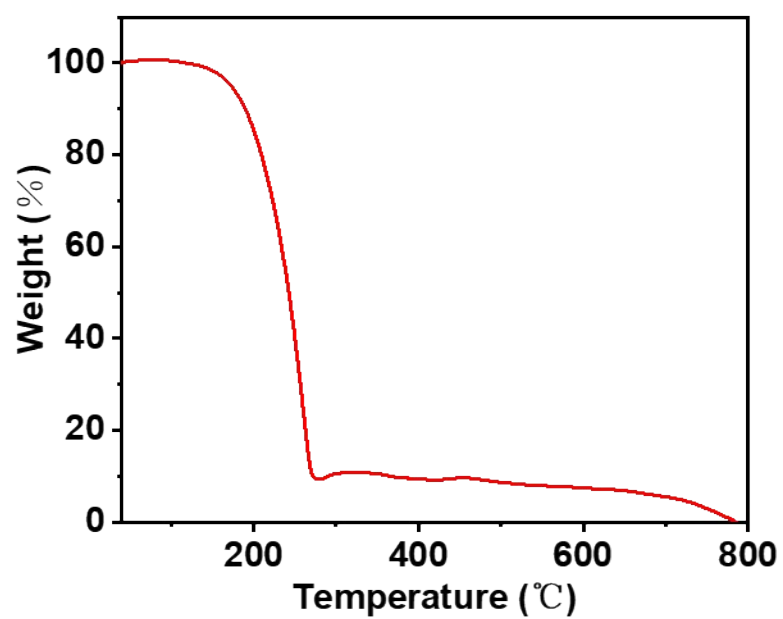

**Figure S7** The thermogravimetric analysis (TGA) of  $(\text{NII})_2\text{SbCl}_5$ .



### 3. Table section

**Table S1** Summary of the optical properties of the Sb-based organic-inorganic hybrid metal halides.

| <b>Compounds</b>                                                                 | $\lambda_{em}$<br>(nm) | <b>Lifetime</b><br>( $\mu$ s) | <b>PLQY</b><br>(%) | <b>Ref</b> |
|----------------------------------------------------------------------------------|------------------------|-------------------------------|--------------------|------------|
| (Bzmim) <sub>3</sub> SbCl <sub>6</sub>                                           | 525                    | 2.4                           | 87.5               | [3]        |
| (Bzmim) <sub>2</sub> SbCl <sub>5</sub>                                           | 600                    | 2.6                           | 22.3               | [3]        |
| (TTA) <sub>2</sub> SbCl <sub>5</sub>                                             | 625                    | 7.49                          | 86                 | [4]        |
| (TEBA) <sub>2</sub> SbCl <sub>5</sub>                                            | 590                    | 7.73                          | 98                 | [4]        |
| (TMA) <sub>2</sub> SbCl <sub>5</sub> ·DMF                                        | 630                    | 6.62                          | 67                 | [5]        |
| (TPA) <sub>2</sub> SbCl <sub>5</sub>                                             | 610                    | 5.3                           | 95                 | [6]        |
| (C <sub>13</sub> H <sub>22</sub> N) <sub>2</sub> Sb <sub>2</sub> Cl <sub>8</sub> | 865                    | 1.87                          | 5                  | [7]        |
| (C <sub>10</sub> H <sub>16</sub> N) <sub>2</sub> Sb <sub>2</sub> Cl <sub>8</sub> | 990                    | 1.58                          | 3                  | [7]        |
| (C <sub>16</sub> H <sub>36</sub> P)SbCl <sub>4</sub>                             | 1070                   | 1.34                          | 1                  | [7]        |
| (C <sub>16</sub> H <sub>28</sub> N) <sub>2</sub> SbCl <sub>5</sub>               | 633                    | 4.71                          | 98                 | [8]        |
| (2cepyH)SbCl <sub>4</sub>                                                        | 570                    | 6.85                          | 5                  | [9]        |

**Table S2** Crystal data for (NII)<sub>2</sub>SbCl<sub>5</sub> single crystal.

| <b>Empirical formula</b>                       | <b>C<sub>24</sub>H<sub>36</sub>Cl<sub>5</sub>N<sub>2</sub>Sb</b> |
|------------------------------------------------|------------------------------------------------------------------|
| Formula weight                                 | 651.55                                                           |
| Temperature (K)                                | 296(2)                                                           |
| Crystal system                                 | monoclinic                                                       |
| Space group                                    | P2 <sub>1</sub> /n                                               |
| a/Å                                            | 13.916                                                           |
| b/Å                                            | 8.620                                                            |
| c/Å                                            | 26.092                                                           |
| α/°                                            | 90                                                               |
| β/°                                            | 102.084                                                          |
| γ/°                                            | 90                                                               |
| Volume/Å <sup>3</sup>                          | 3060.5(13)                                                       |
| Z                                              | 4                                                                |
| Density <sub>(calc)</sub> g/cm <sup>3</sup>    | 1.414                                                            |
| μ(mm <sup>-1</sup> )                           | 1.352                                                            |
| F(000)                                         | 1320                                                             |
| Crystal size/mm <sup>3</sup>                   | 0.200×0.200×0.200                                                |
| Radiation                                      | MoKα(λ=0.71073)                                                  |
| Theta range for data collection/°              | 2.494 to 24.995                                                  |
| Index ranges                                   | -16≤h≤16, -10≤k≤9, -30≤l≤30                                      |
| Reflections collected                          | 45617                                                            |
| Independent reflections                        | 5358 [R <sub>int</sub> = 0.0686]                                 |
| Data / restraints / parameters                 | 5358 / 0 / 299                                                   |
| Goodness-of-fit on F <sup>2</sup>              | 1.072                                                            |
| Final R indices [I>2σ(I)]                      | R <sub>1</sub> = 0.0512, wR <sub>2</sub> = 0.1372                |
| R indices [all data]                           | R <sub>1</sub> = 0.0816, wR <sub>2</sub> = 0.1531                |
| Largest diff. peak and hole/ e Å <sup>-3</sup> | 1.284 and -0.523                                                 |
| The CCDC number                                | 2210581                                                          |

**Table S3** Band angle and length for (NII)<sub>2</sub>SbCl<sub>5</sub>

| <b>Bonds</b> | <b>Angle/°</b> | <b>Bond</b> | <b>Length/Å</b> |
|--------------|----------------|-------------|-----------------|
| Cl1-Sb1-Cl2  | 92.26          | Sb1-Cl3     | 2.3781          |
| Cl1-Sb1-Cl5  | 85.52          | Sb1-Cl2     | 2.7668          |
| Cl5-Sb1-Cl4  | 90.17          | Sb1-Cl1     | 2.6671          |
| Cl4-Sb1-Cl2  | 92.04          | Sb1-Cl5     | 2.536           |
| Cl1-Sb1-Cl3  | 89.53          | Sb1-Cl4     | 2.5323          |
| Cl5-Sb1-Cl3  | 89.31          |             |                 |
| Cl4-Sb1-Cl3  | 90.59          |             |                 |
| Cl2-Sb1-Cl3  | 84.24          |             |                 |
| Cl4-Sb1-Cl1  | 175.69         |             |                 |
| Cl5-Sb1-Cl2  | 173.20         |             |                 |

## Reference

- [1] G. Kresse and J. Hafner, *Phys. Rev. B* **1993**, 48, 13115-13118.
- [2] G. Kresse and J. Furthmuller, *Phys. Rev. B* **1996**, 54, 11169-11186.
- [3] Z. Wang, Z. Zhang, L. Tao, N. Shen, B. Hu, L. Gong, J. Li, X. Chen and X. Huang, *Angew. Chem. Int. Ed* **2019**, 58, 9974-9978.
- [4] Z. Li, Y. Li, P. Liang, T. Zhou, L. Wang and R.-J. Xie, *Chem. Mater.* **2019**, 31, 9363-9371.
- [5] Q. Wei, T. Chang, R. Zeng, S. Cao, J. Zhao, X. Han, L. Wang and B. Zou, *J. Phys. Chem. Lett.* **2021**, 12, 7091-7099.
- [6] H. Peng, Y. Tian, X. Wang, T. Huang, Y. Xiao, T. Dong, J. Hu, J. Wang and B. Zou, *J. Mater. Chem. C* **2021**, 9, 12184-12190.
- [7] B. Su, S. Geng, Z. Xiao and Z. Xia, *Angew. Chem. Int. Ed* **2022**, 61, e202208881.
- [8] H. Peng, Y. Tian, Z. Yu, X. Wang, B. Ke, Y. Zhao, T. Dong, J. Wang and B. Zou, *Sci. China Mater* **2022**, 65, 1594-1600.
- [9] Z. Qi, Y. Chen, H. Gao, F.-Q. Zhang, S.-L. Li and X.-M. Zhang, *Sci China Chem* **2021**, 64, 2111-2117.
